# Supplementary material for: Endothelial cell telomere dysfunction induces senescence and results in vascular and metabolic impairments
Source: PubMed Central journal article supplement (PMC10410008; doi:10.1111/acel.13875), 2023-05-31
Supplement: ACEL-22-e13875-s001.pdf [file ACEL-22-e13875-s001.pdf]

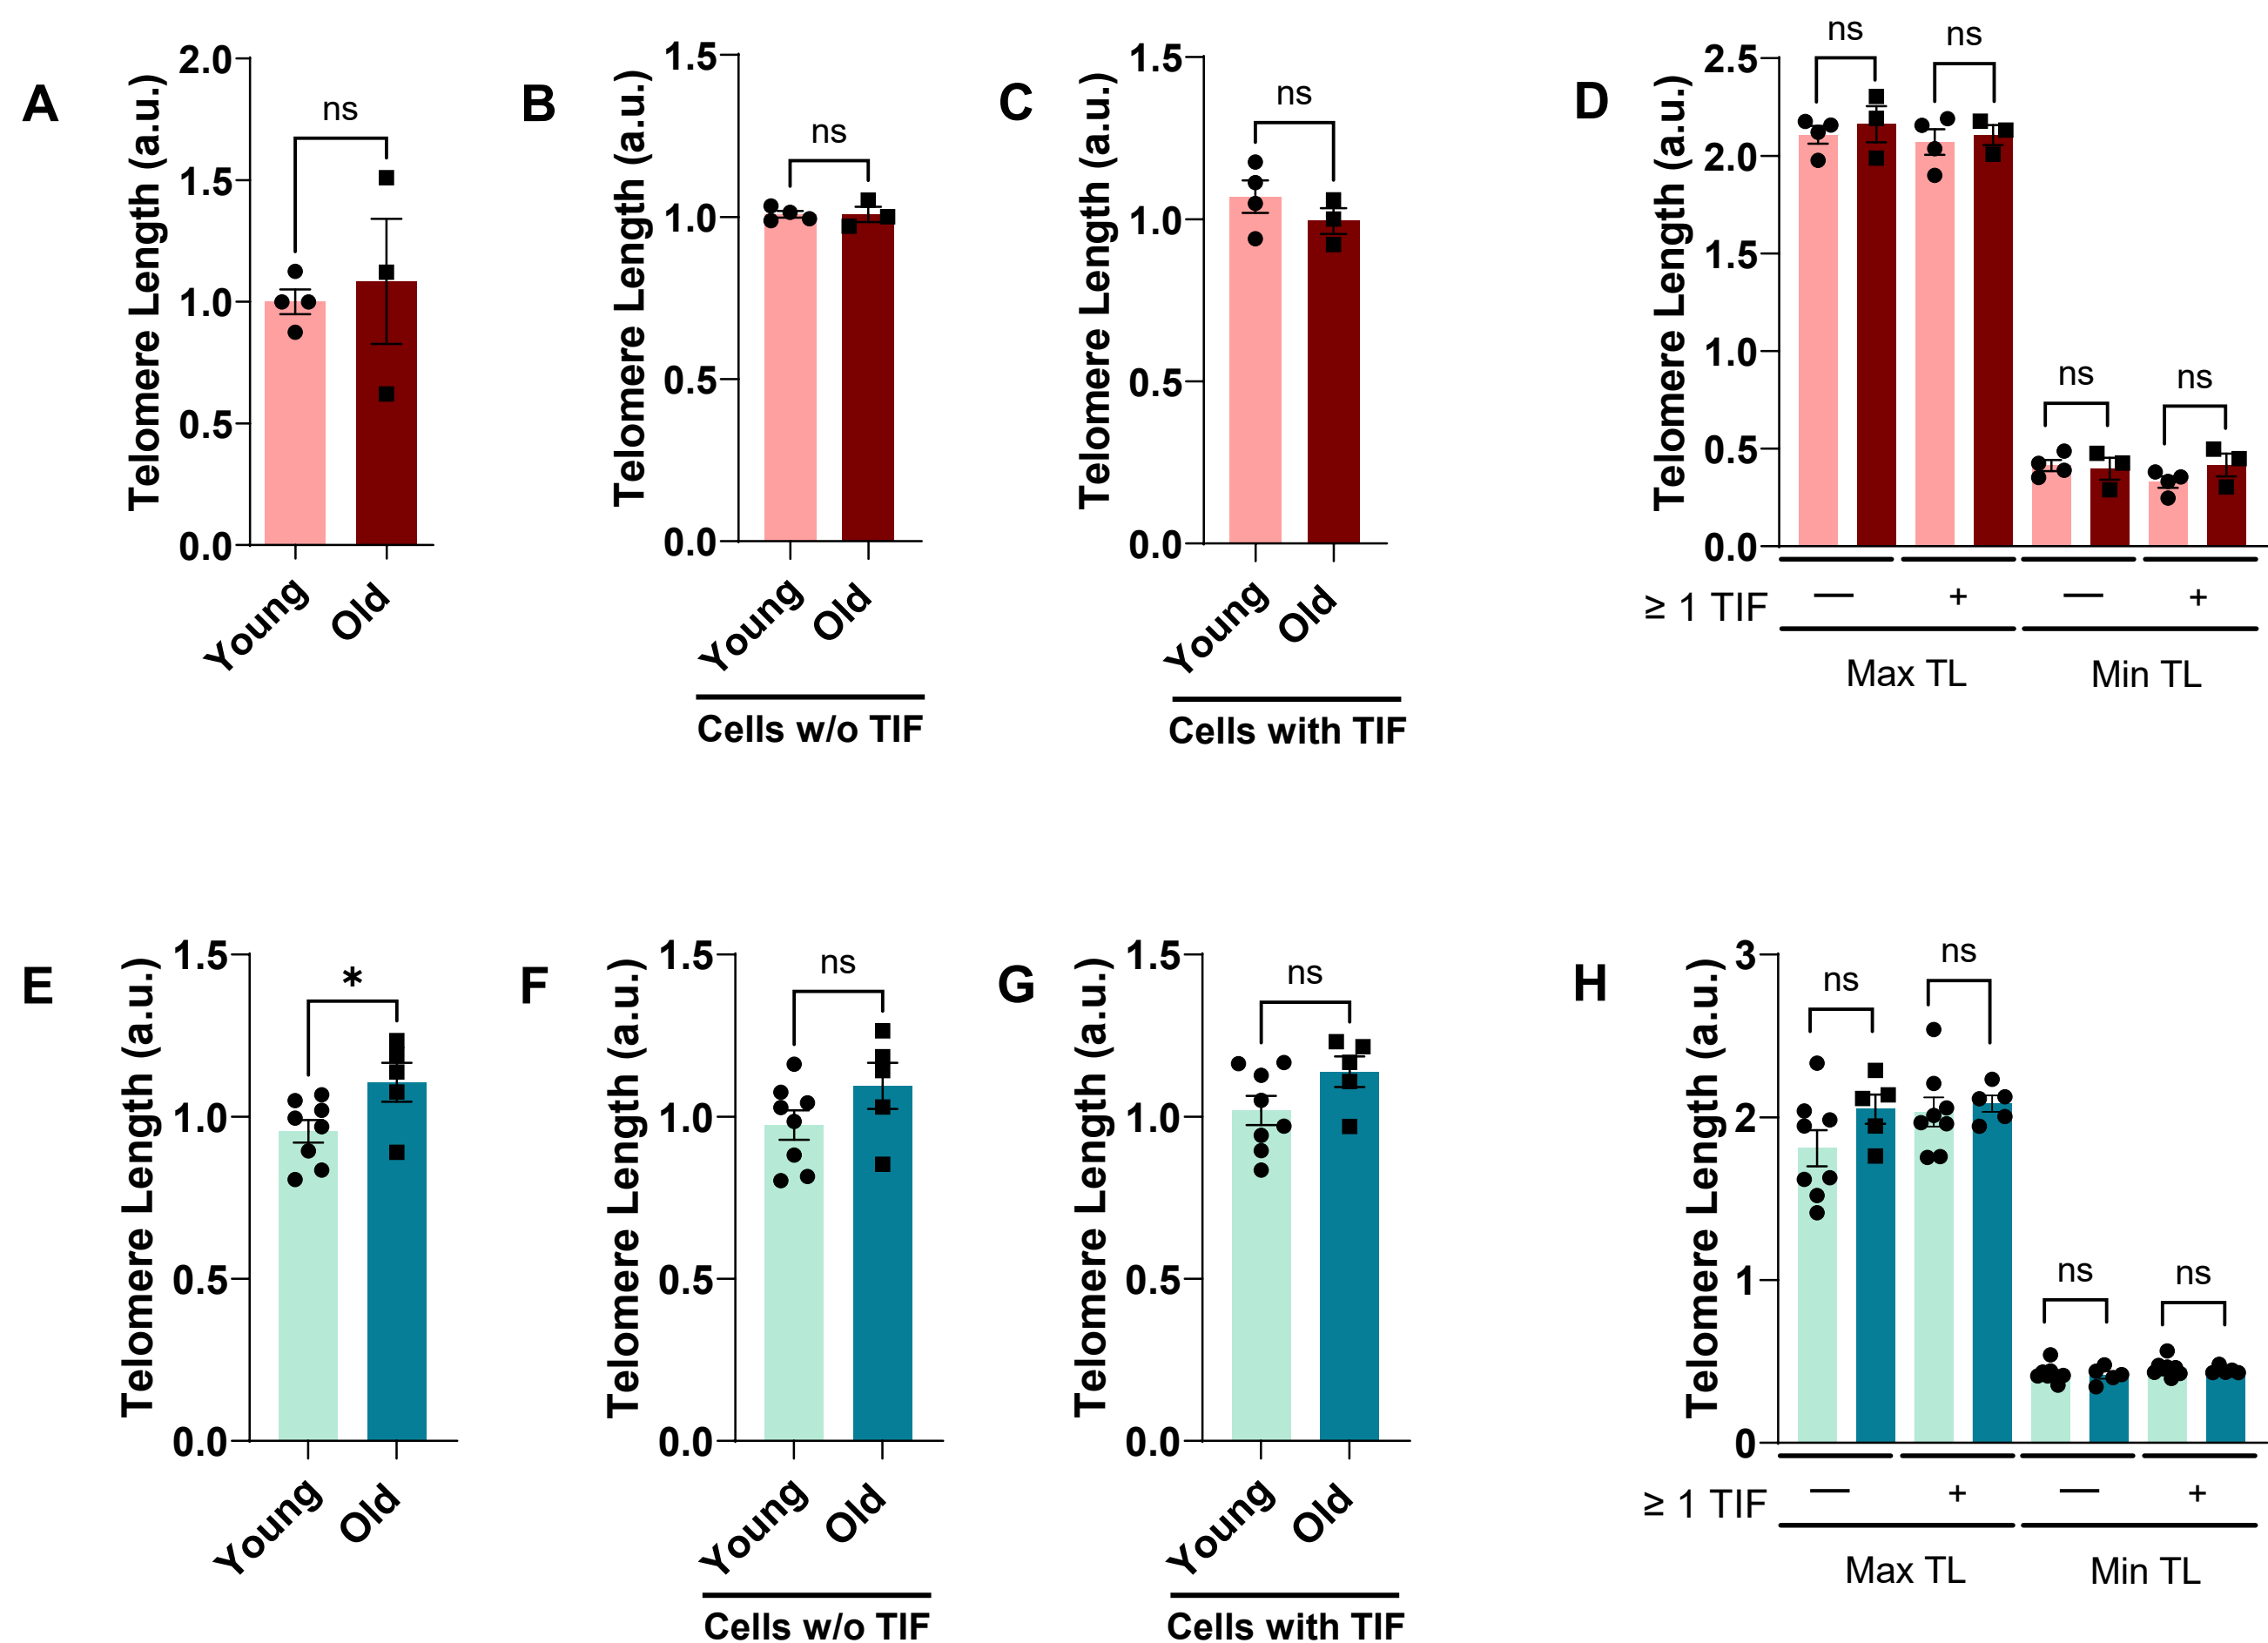

**Supplementary Figure 1. Effect of aging on lung endothelial cell telomere length and influence of telomere length on telomere dysfunction.** (A-D) Human lung endothelial cell telomere analysis from two young ( $29 \pm 1$  yo) and two old ( $67 \pm 1$  yo) donors. (A) Mean telomere length in endothelial cells. (B) Mean telomere length in cells without (w/o) one or more telomere dysfunction-induced foci (TIF). (C) Mean telomere length in cells containing one or more telomere dysfunction-induced foci (TIF). (D) Maximum and minimum telomere length in endothelial cells with and without one or more telomere dysfunction-induced foci (TIF).  $N = 3 - 4$  experimental replicates. (E-H) Mouse lung endothelial cells. (E) Mean telomere length in endothelial cells. (F) Mean telomere length in cells without (w/o) one or more telomere dysfunction-induced foci (TIF). (G) Mean telomere length in cells containing one or more telomere dysfunction-induced foci (TIF). (H) Maximum and minimum telomere length in endothelial cells with and without one or more telomere dysfunction-induced foci (TIF).  $N = 5 - 8$  experimental replicates. Data are mean  $\pm$  SEM. \* $p < 0.05$ .

Table S1. Animal characteristics

| <b>Genotype</b>          | <b>WT</b>     | <b>EC-TRF2<sup>fl/fl</sup></b> | <b>p</b> |
|--------------------------|---------------|--------------------------------|----------|
| N (male/female)          | 25 (13/12)    | 23 (12/11)                     | 0.99     |
| Age (mo)                 | 3.5 ± 0.1     | 3.6 ± 0.2                      | 0.51     |
| Body Mass (g)            | 21.9 ± 0.5    | 23.4 ± 0.7                     | 0.09     |
| Heart Mass (mg)          | 117.9 ± 6.5   | 126.0 ± 6.7                    | 0.39     |
| Heart: Body Mass (mg/g)  | 5.6 ± 0.3     | 5.4 ± 0.3                      | 0.71     |
| pgWAT (mg)               | 247.0 ± 21.9  | 315.7 ± 34.1                   | 0.09     |
| pgWAT: Body Mass (mg/g)  | 11.5 ± 1.0    | 14.0 ± 1.5                     | 0.15     |
| Liver (mg)               | 1176.4 ± 66.6 | 1312.0 ± 56.2                  | 0.13     |
| Liver: Body Mass (mg/g)  | 55.0 ± 2.9    | 57.2 ± 1.5                     | 0.52     |
| Kidney (mg)              | 276.9 ± 14.8  | 316.8 ± 10.0                   | 0.03     |
| Kidney: Body Mass (mg/g) | 13.2 ± 0.8    | 13.7 ± 0.3                     | 0.56     |
| Spleen (mg)              | 116.2 ± 15.2  | 102.3 ± 5.8                    | 0.37     |
| Speen: Body Mass (mg/g)  | 4.9 ± 0.7     | 4.5 ± 0.3                      | 0.53     |
| Quad (mg)                | 298.3 ± 15.7  | 325.7 ± 17.0                   | 0.25     |
| Quad: Body Mass (mg/g)   | 13.9 ± 0.7    | 14.4 ± 0.7                     | 0.62     |
| Soleus (mg)              | 10.8 ± 2.2    | 11.9 ± 1.6                     | 0.67     |
| Soleus: Body Mass (mg/g) | 0.5 ± 0.1     | 0.4 ± 0.1                      | 0.81     |

Data are mean ± SEM

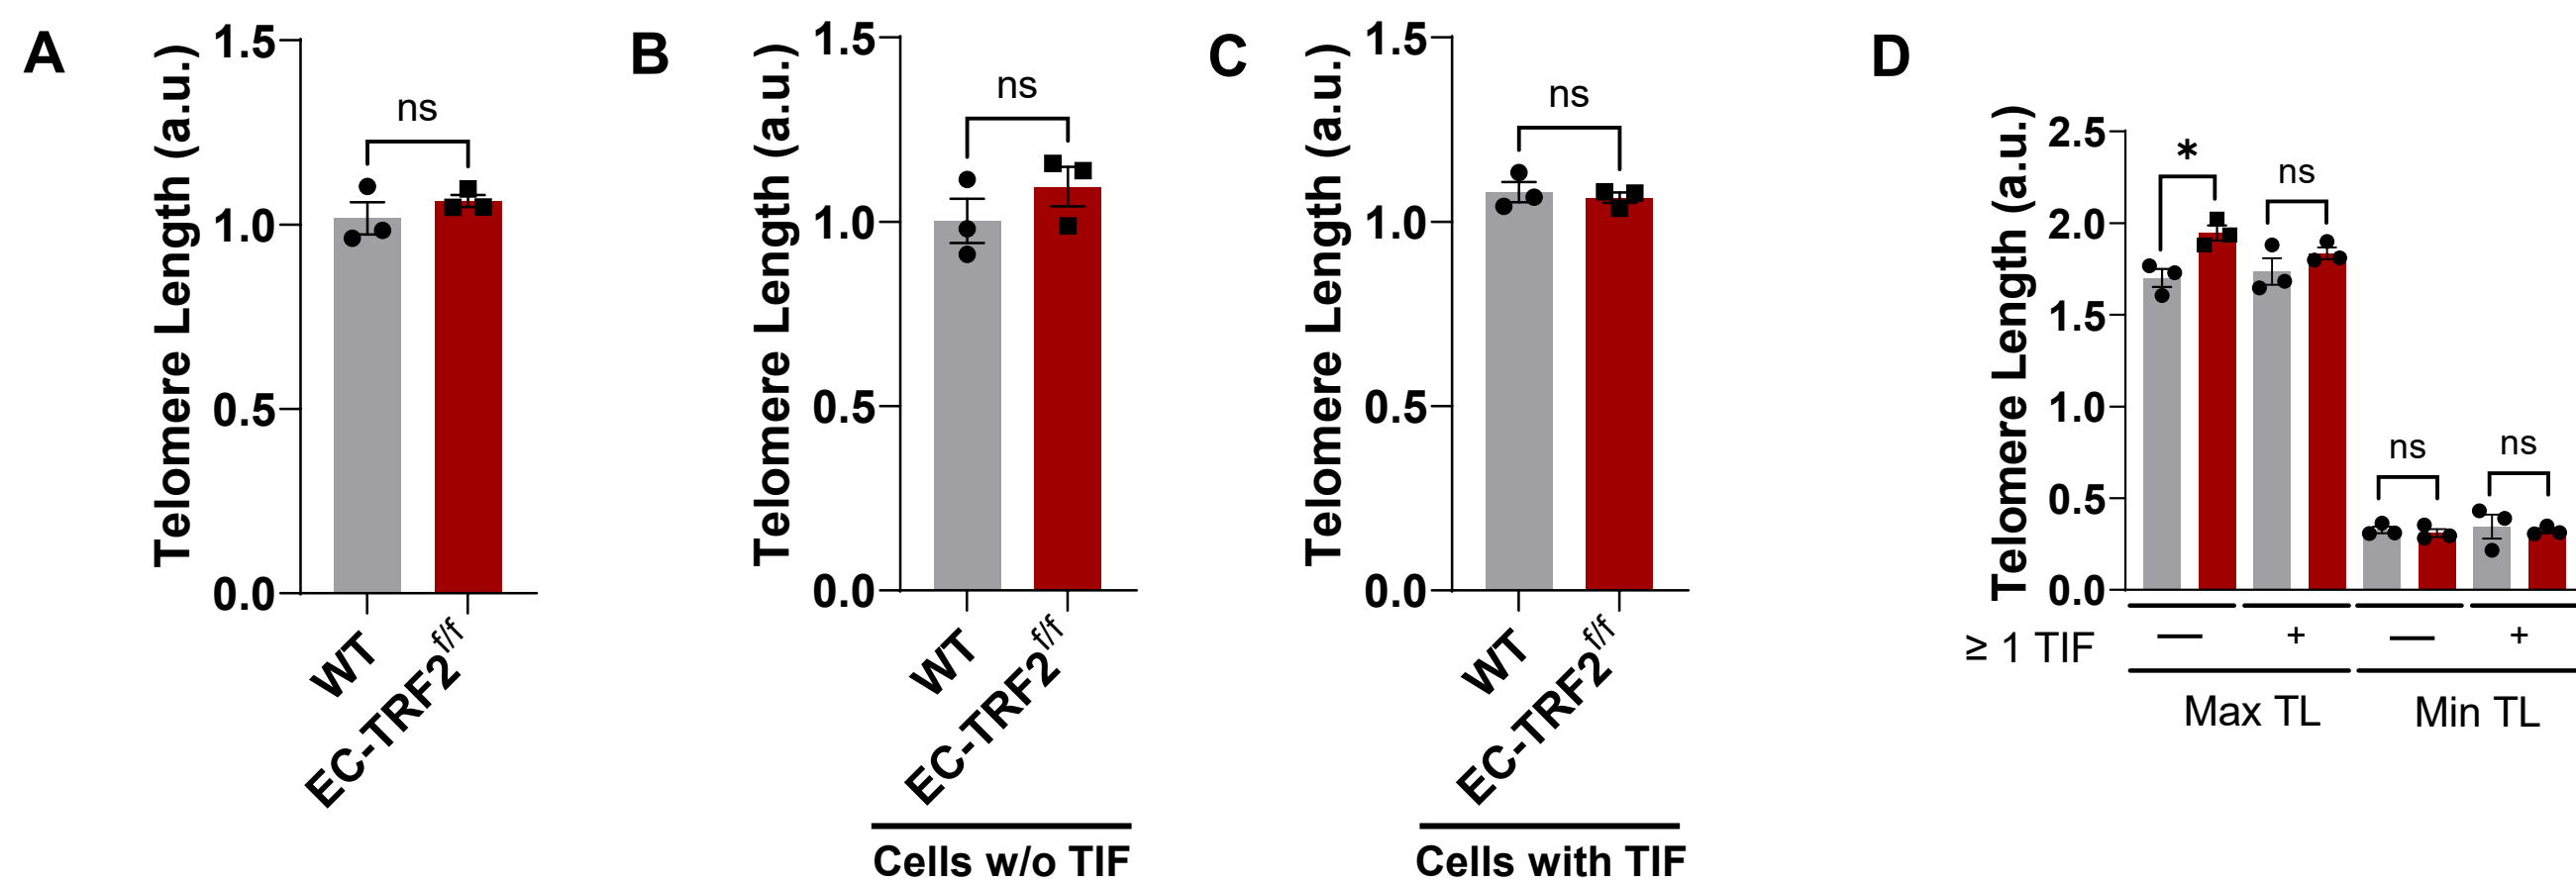

**Supplementary Figure 2. Effect of endothelial cell *Trf2* reduction on telomere length, and influence of telomere length on telomere dysfunction.** (A) Mean telomere length in endothelial cells. (B) Mean telomere length in cells without (w/o) one or more telomere dysfunction-induced foci (TIF). (C) Mean telomere length in cells containing one or more telomere dysfunction-induced foci (TIF). (D) Maximum and minimum telomere length in endothelial cells with and without one or more telomere dysfunction-induced foci (TIF). N = 3 per group. Data are mean  $\pm$  SEM. \*p < 0.05.

Table S2. EC<sub>50</sub> of mesenteric artery dose-response curves

| <b>Genotype</b>                 | <b>WT</b>  | <b>EC-TRF2<sup>ff</sup></b> | <b><i>p</i></b> |
|---------------------------------|------------|-----------------------------|-----------------|
| EC <sub>50</sub> , log <i>M</i> |            |                             |                 |
| ACh                             | -6.0 ± 0.2 | -6.0 ± 0.2                  | 0.33            |
| ACh + L-NAME                    | -5.4 ± 0.3 | -5.2 ± 0.2                  | 0.55            |
| SNP                             | -7.3 ± 0.1 | -7.2 ± 0.2                  | 0.55            |
| ACh + TEMPOL                    | -6.6 ± 0.3 | -6.2 ± 0.3                  | 0.99            |
| ACh + TEMPOL + L-NAME           | -6.6 ± 0.4 | -6.3 ± 0.7                  | 0.39            |
| EC <sub>50</sub> , nM           |            |                             |                 |
| Ins                             | 0.8 ± 0.4  | 0.3 ± 0.2                   | 0.20            |
| Ins + L-NAME                    | 1.5 ± 0.6  | 1.2 ± 0.5                   | 0.76            |

Data are mean ± SEM

Table S3. Primer sequences for RT-qPCR

| <b>Genes</b>                   | <b>Forward</b>                 | <b>Reverse</b>                |
|--------------------------------|--------------------------------|-------------------------------|
| <i>18s</i>                     | 5'-TAGAGGGACAAGTGGCGTTC-3'     | 5'-CGCTGAGCCAGTCAGTGT-3'      |
| <i>rplp0</i>                   | 5'-AGATTCGGGATAGCTGTTGGC-3'    | 5'-TCGGGTCCTAGACCAGTGTTTC-3'  |
| <i>Trf2</i>                    | 5'-GTGGAACAGCCCTAACGGG-3'      | 5'-CCACTCGCTTTTCTTCTATGGTC-3' |
| <i>p16</i>                     | 5'-CGCAGGTTCTTGGTCACTGT-3'     | 5'-TGTTACGAAAGCCAGAGCG-3'     |
| <i>p21</i>                     | 5'-CCTGGTGATGTCCGACCTG-3'      | 5'-CCATGAGCGCATCGCAATC-3'     |
| <i>mcp1</i>                    | 5'-GCATCCACGTGTTGGCTCA-3'      | 5'-CTCCAGCCTACTCATTGGGATCA-3' |
| <i>il-1<math>\beta</math></i>  | 5'-CACAGCAGCACATCAACAAG-3'     | 5'-GTGCTCATGTCCTCATCCTG-3'    |
| <i>il-1<math>\alpha</math></i> | 5'-CGAAGACTACAGTTCTGCCATT-3'   | 5'-GACGTTTCAGAGGTTCTCAGAG-3'  |
| <i>il-6</i>                    | 5'-CTGGGAAATCGTGGAAT-3'        | 5'-CCAGTTTGGTAGCATCCATC-3'    |
| <i>cxcl2</i>                   | 5'-CCTGGTTCAGAAAATCATCCA-3'    | 5'-CTTCCGTTGAGGGACAGC-3'      |
| <i>tnf-<math>\alpha</math></i> | 5'-ATGAGAAGTTCCCAAATGGC-3'     | 5'-CTCCACTTGGTGGTTTGCTA-3'    |
| <i>pai-1</i>                   | 5'-GACACCCTCAGCATGTTTCATC-3'   | 5'-AGGGTTGCACTAAACATGTCAG-3'  |
| <i>mmp3</i>                    | 5'-ACATGGAGACTTTGTCCCTTTTG -3' | 5'-TTGGCTGAGTGGTAGAGTCCC-3'   |
| <i>sod1</i>                    | 5'-AACCAGTTGTGTTGTCAGGAC-3'    | 5'-CCACCATGTTTCTTAGAGTGAGG-3' |
| <i>sod2</i>                    | 5'-CAGACCTGCCTACGACTATGG-3'    | 5'-CTCGGTGGCGTTGAGATTGTT-3'   |
| <i>sod3</i>                    | 5'-CCTTCTTGTTCTACGGCTTGC-3'    | 5'-TCGCCTATCTTCTCAACCAGG-3'   |
| <i>nox1</i>                    | 5'-AGTGATGTATGCAGCATTACCA-3'   | 5'-CCATAGCTGACGTTACCATGAGA-3' |
| <i>nox2</i>                    | 5'-CGCATGCCTTTGAGTGGTTT-3'     | 5'-ACGCCTATTGTGGTGTAGGG-3'    |
| <i>nox4</i>                    | 5'-GAAGGGGTAAACACCTCTGC-3'     | 5'-ATGCTCTGCTTAAACACAATCCT-3' |
| <i>xo</i>                      | 5'-GAATGGCAAAAAGGTGGTGGA-3'    | 5'-AGCAACATGATGCAAGGAGC-3'    |
| <i>cd3e</i>                    | 5'-GACTATGAGCCCATCCGCAA-3'     | 5'TAGGACACFGTGTTCCACCAGGA-3'  |
| <i>foxp3</i>                   | 5'-GGCCCTTCTCCAGGACAGA-3'      | 5'GCTGATCATGGCTGGGTTGT-3'     |
